# Supplementary material for: ITGB2 and ICAM3 predict increased survival of sepsis with decreased intercellular communication in Cytotoxic CD8+ T- cells
Source: Research Square preprint supplement (doi:10.21203/rs.3.rs-4802382/v1), 2024-09-09
Supplement: Supplementary file 1 [file 50a52cda8cc20eaa48da4dca.docx]

**Table S1** Primer Sequences used for qRT-PCR

| Primer | Sequences (5’-3’) |
| --- | --- |
| ITGB2-F | GCAGCAGAAGGACGGAAGGAAC |
| ITGB2-R | ATGACCAGGAGGAGGACACCAATC |
| SELL-F | AGCCCAACAACAAGAAGTCCAAGG |
| SELL-R | CGTCATCGTTCCATTTCCCAGAGTC |
| ICAM5-F | GATGTGACCCTGACCGTGGAATATG |
| ICAM5-R | CCGTTCCCTCCAGCCAAGTAATATG |
